# Supplementary material for: SARS-CoV-2 ORF10 impairs cilia by enhancing CUL2ZYG11B activity
Source: PubMed Central journal article supplement — J Cell Biol. 2022 Jun 8;221(7):e202108015. doi: 10.1083/jcb.202108015 (PMC9184850; doi:10.1083/jcb.202108015), 2022-06-08

Figure S1A

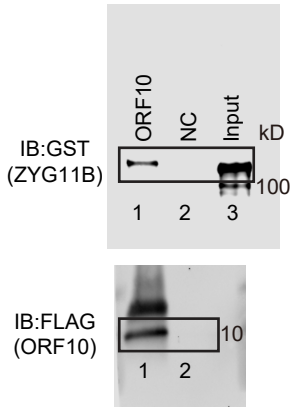

Figure S1B

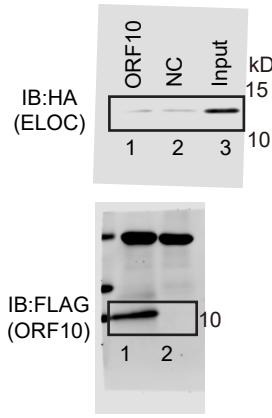

Figure S1C

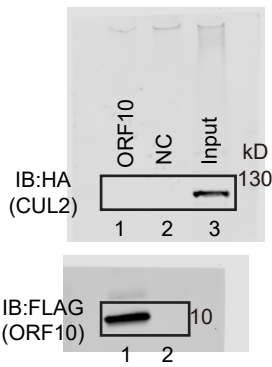

Figure S1D

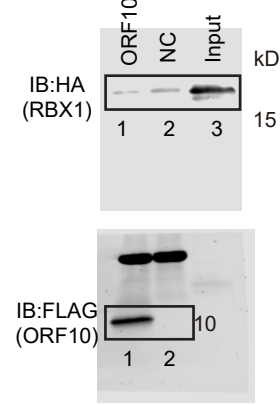

Figure S1H

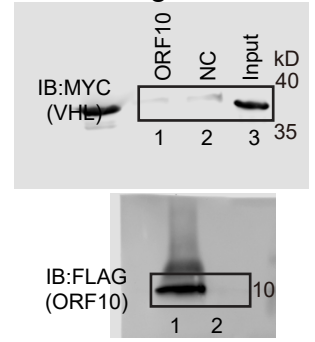

Figure S1E

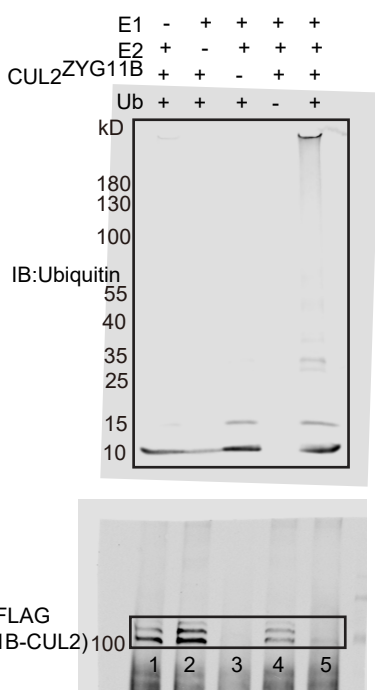

Figure S1F

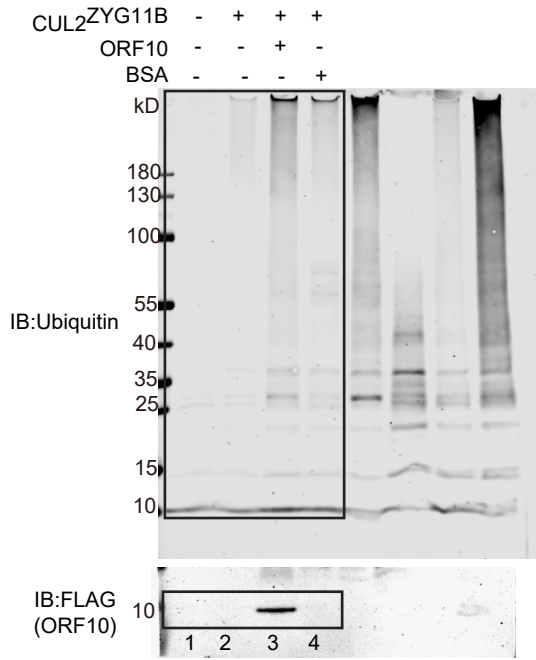

Figure S1G

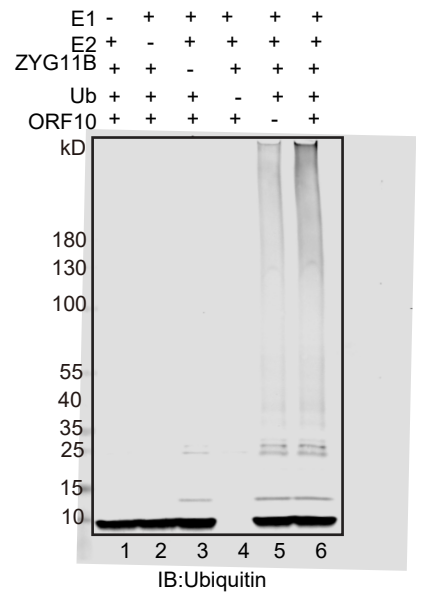

Figure S1J

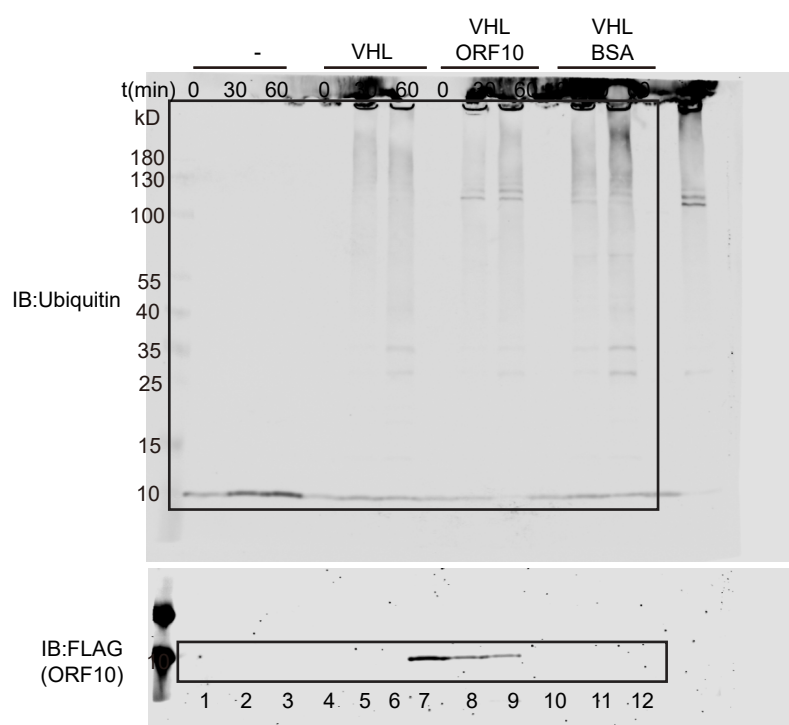

Figure S1I

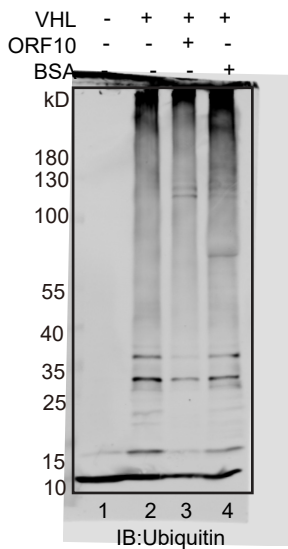

Supplement: JCB_202108015_SourceDataFS1.pdf [file JCB_202108015_SourceDataFS1.pdf]
