# Supplementary figures and images for: SARS-CoV-2 ORF10 impairs cilia by enhancing CUL2ZYG11B activity
Source: PubMed Central journal article supplement — J Cell Biol. 2022 Jun 8;221(7):e202108015. doi: 10.1083/jcb.202108015 (PMC9184850; doi:10.1083/jcb.202108015), 2022-06-08

Figure 1A

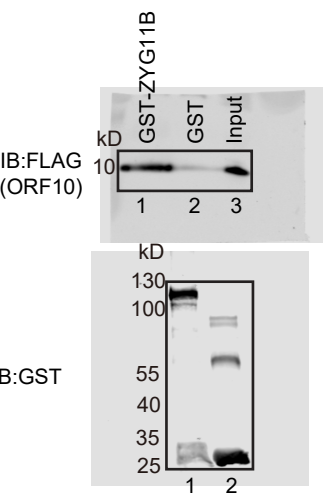

Figure 1C

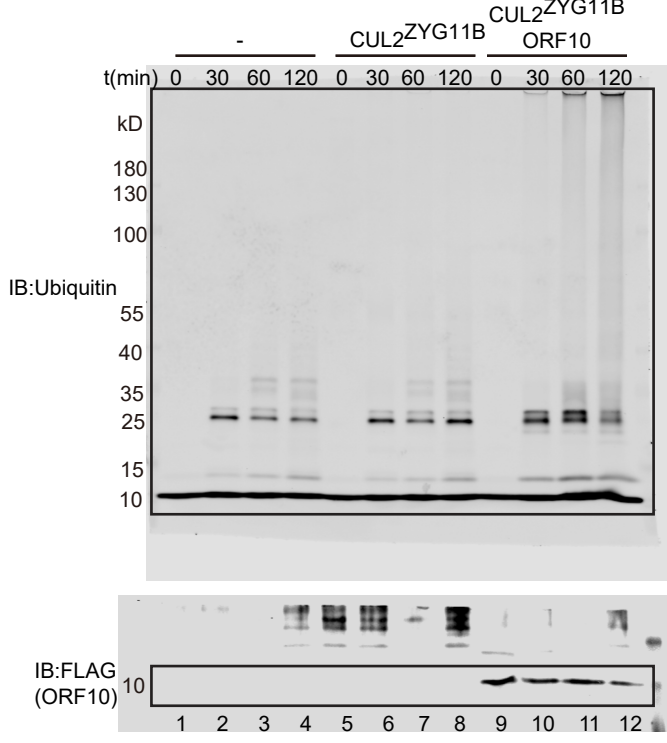

Figure 1D

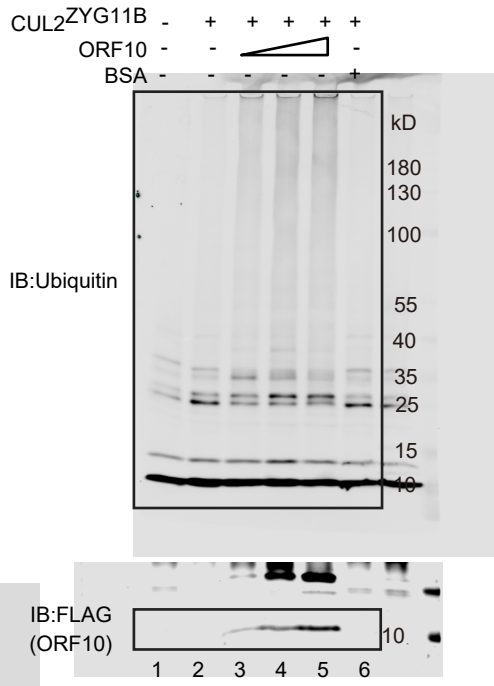

Figure 1E

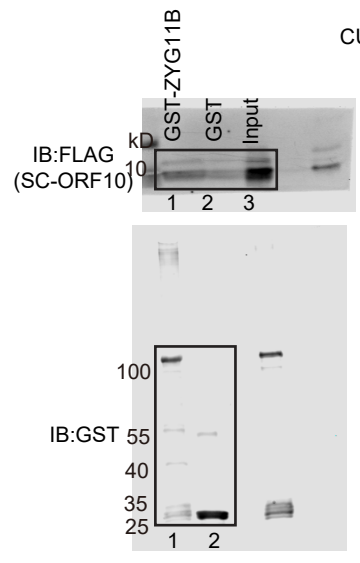

Figure 1F

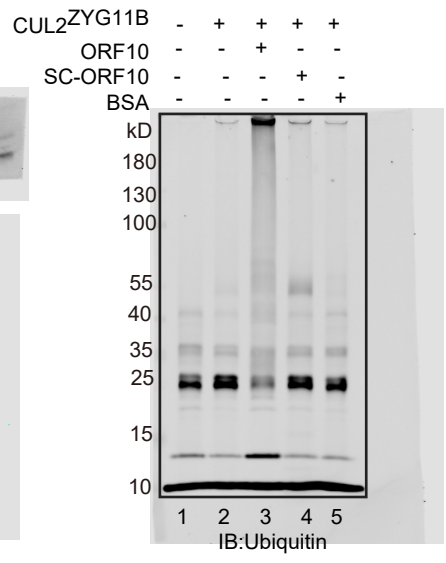

Supplement: JCB_202108015_SourceDataF1.pdf [file JCB_202108015_SourceDataF1.pdf]

Figure 2D

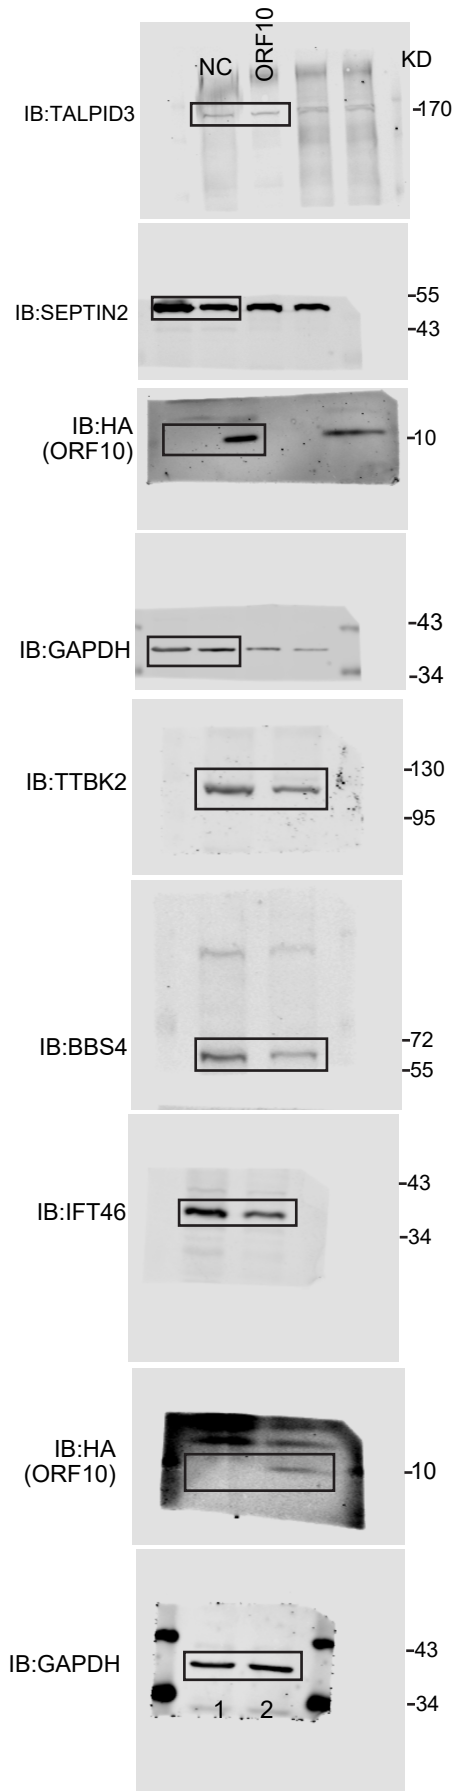

Supplement: JCB_202108015_SourceDataF2.pdf [file JCB_202108015_SourceDataF2.pdf]

Figure 3A

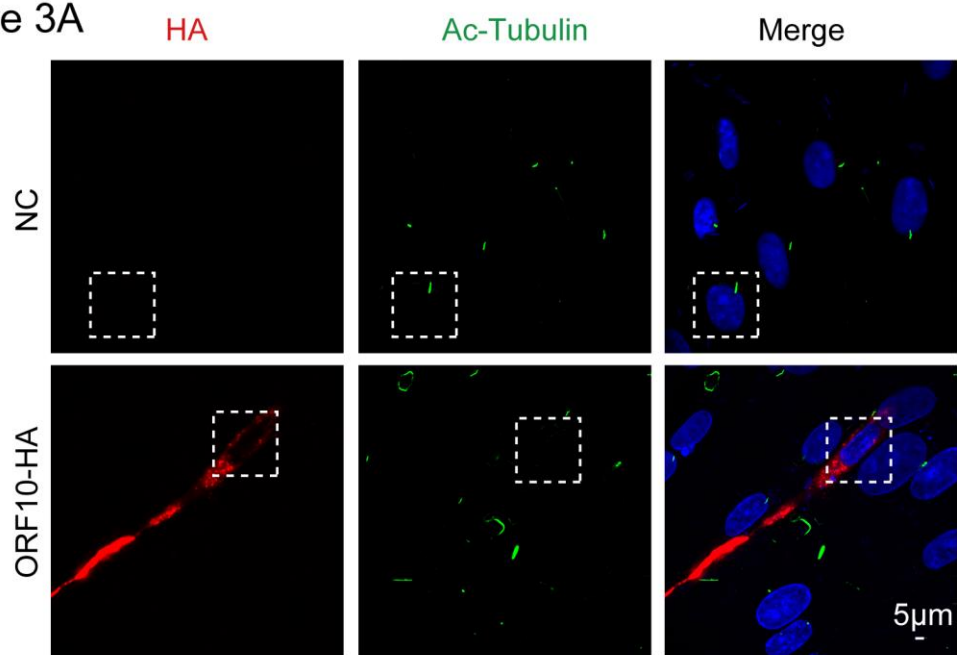

Figure 3C

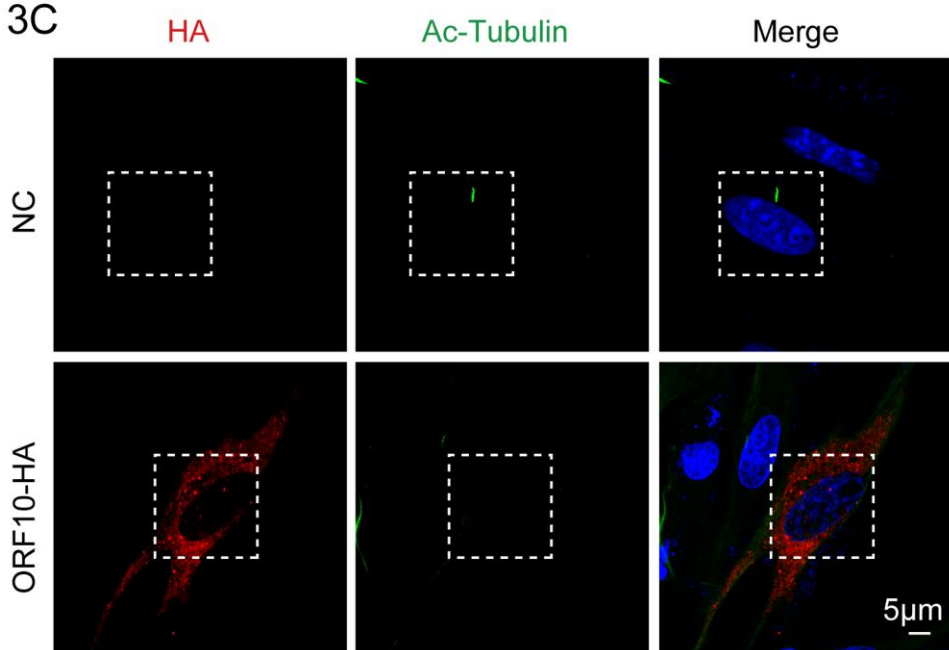

Supplement: JCB_202108015_SourceDataF3.pdf [file JCB_202108015_SourceDataF3.pdf]

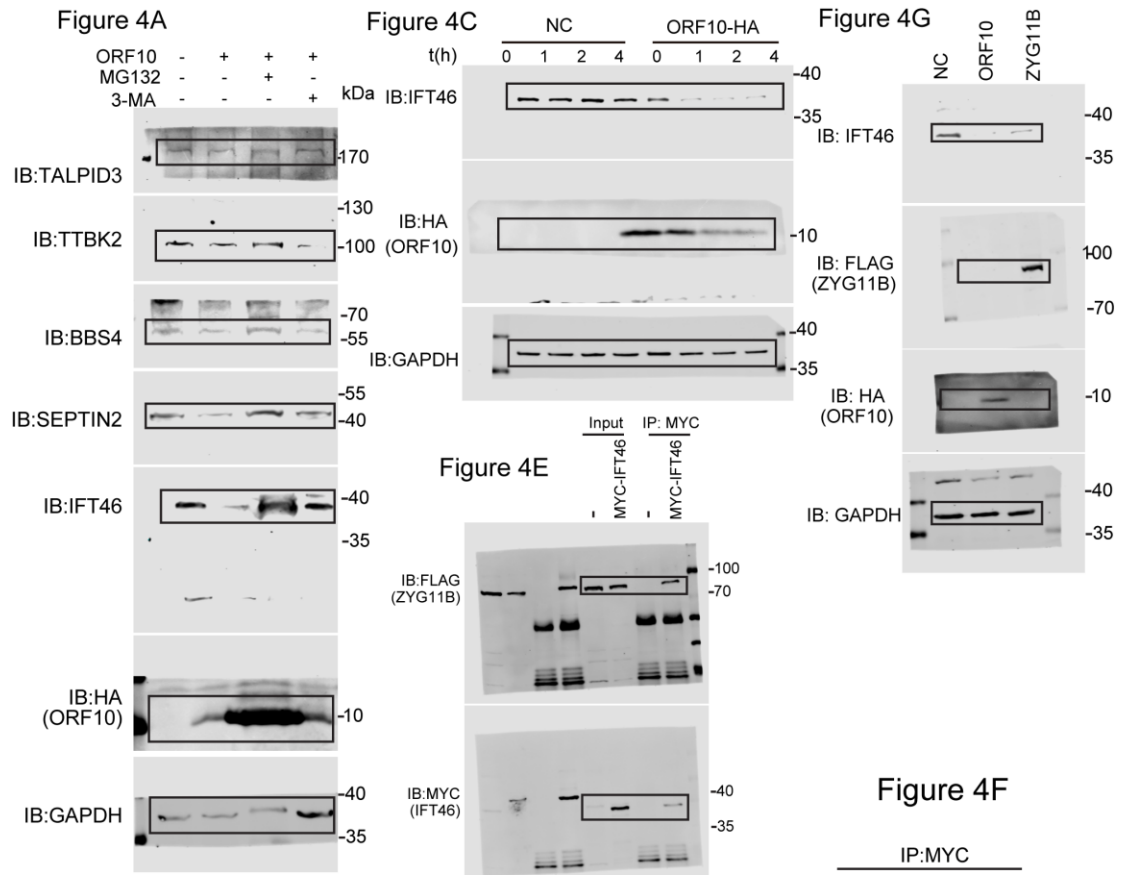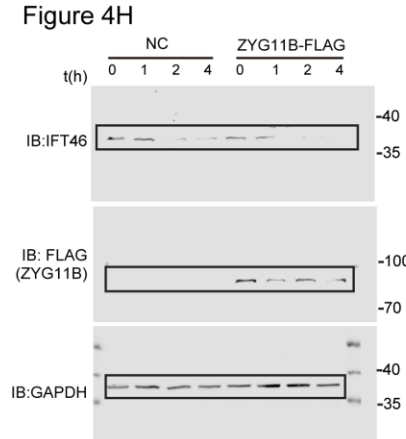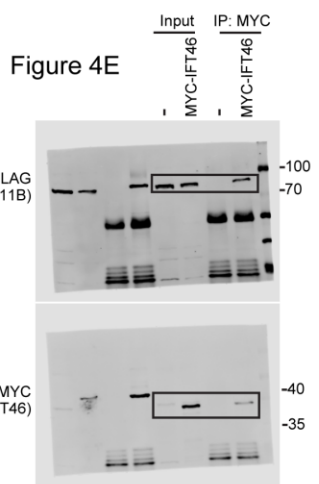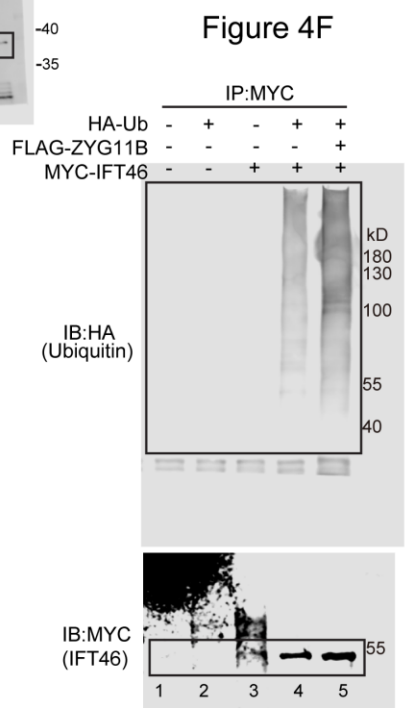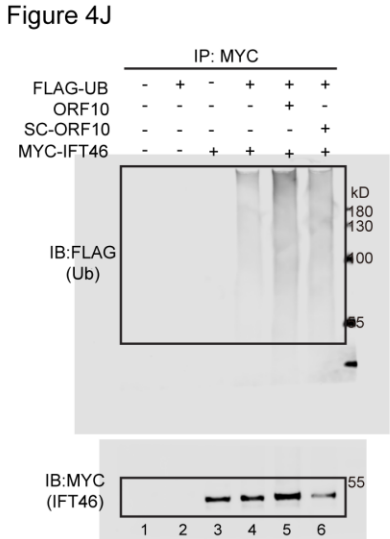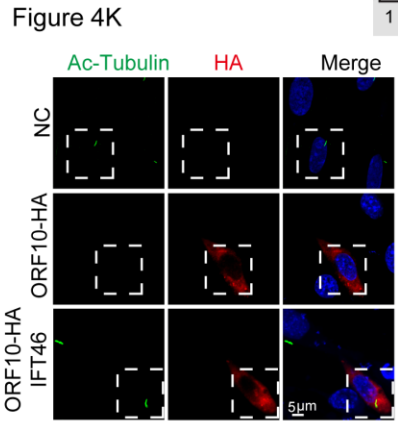

Supplement: JCB_202108015_SourceDataF4.pdf [file JCB_202108015_SourceDataF4.pdf]

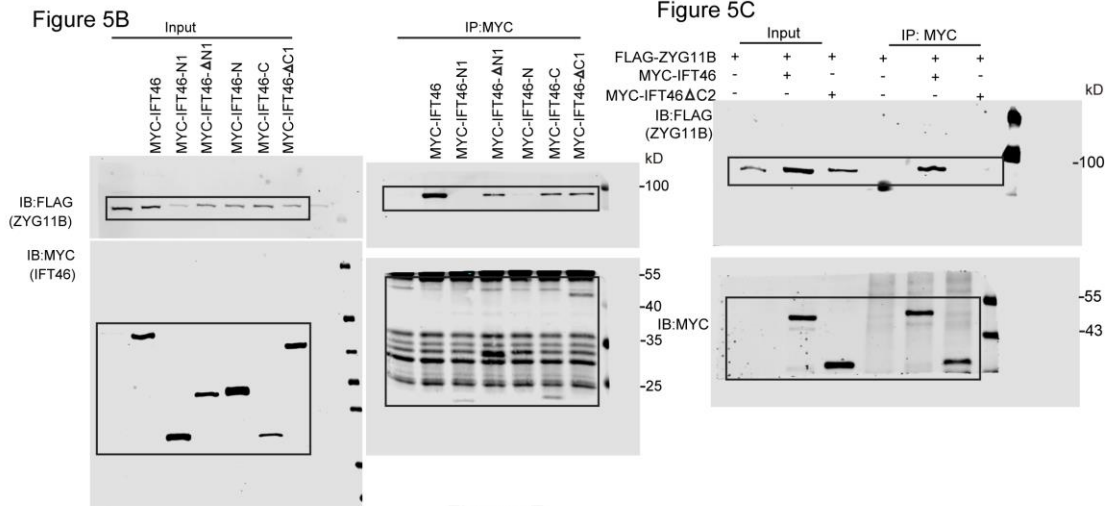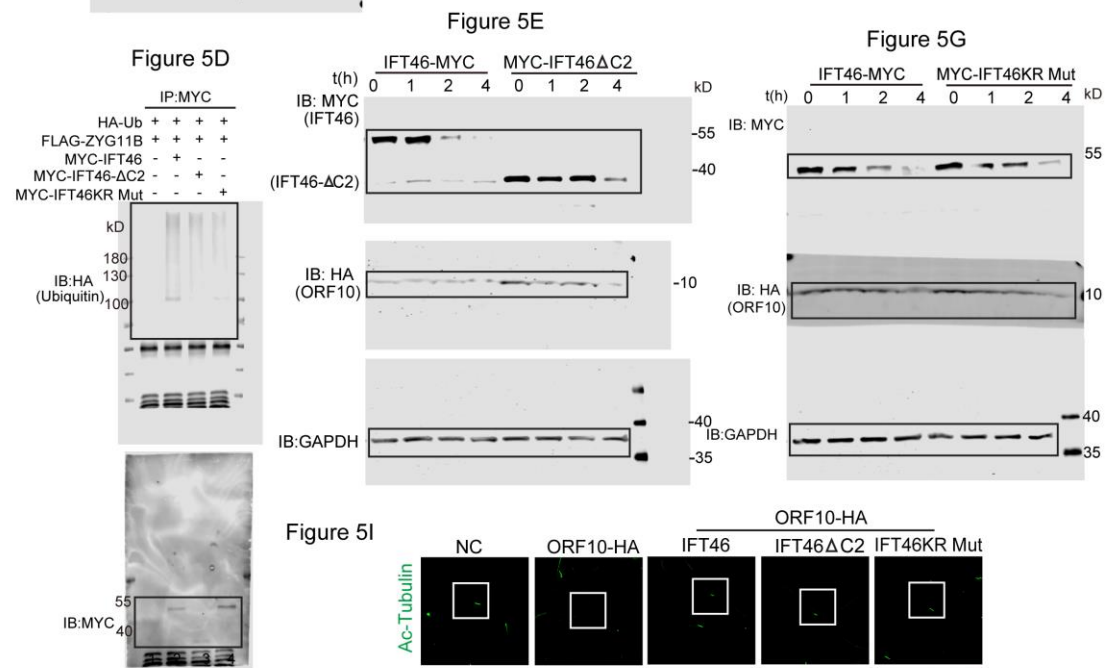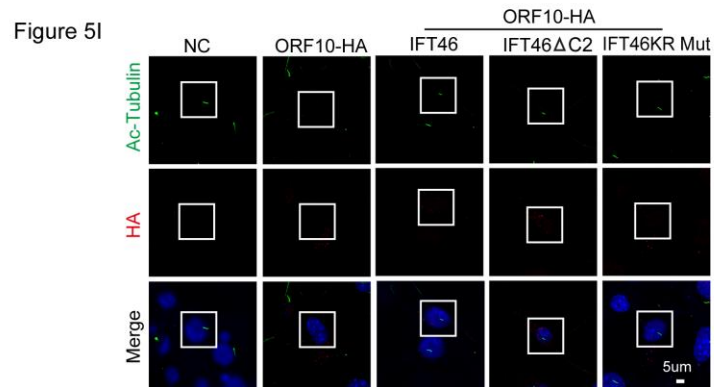

Supplement: JCB_202108015_SourceDataF5.pdf [file JCB_202108015_SourceDataF5.pdf]

Figure 6A

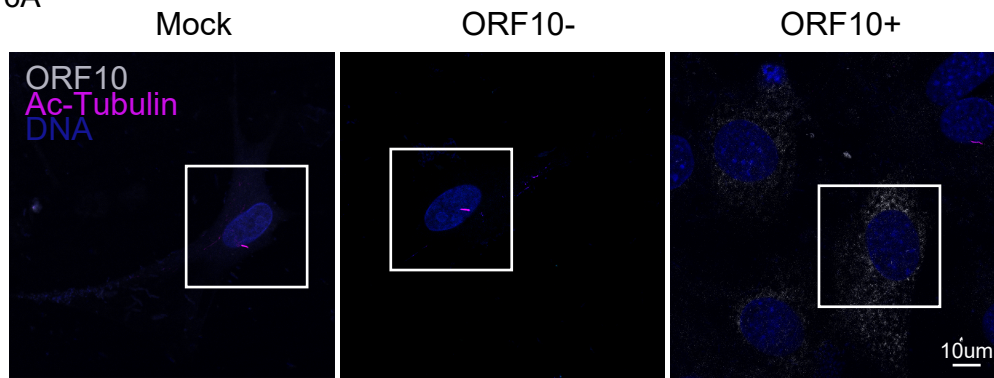

Figure 6D

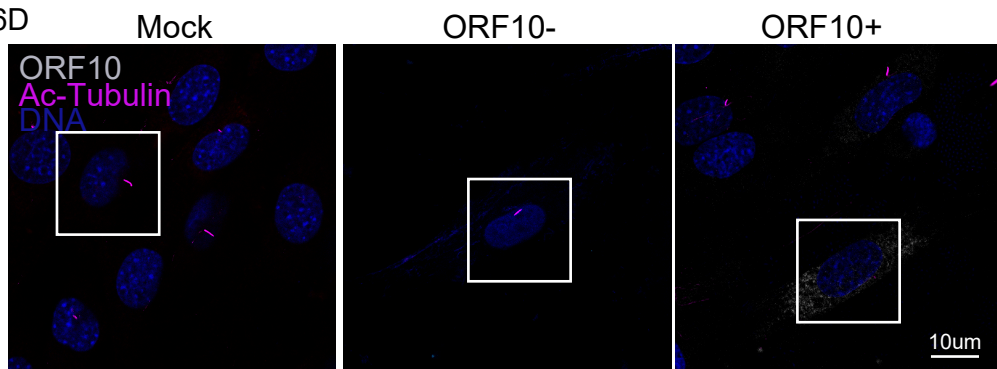

Supplement: JCB_202108015_SourceDataF6.pdf [file JCB_202108015_SourceDataF6.pdf]

Figure 7B

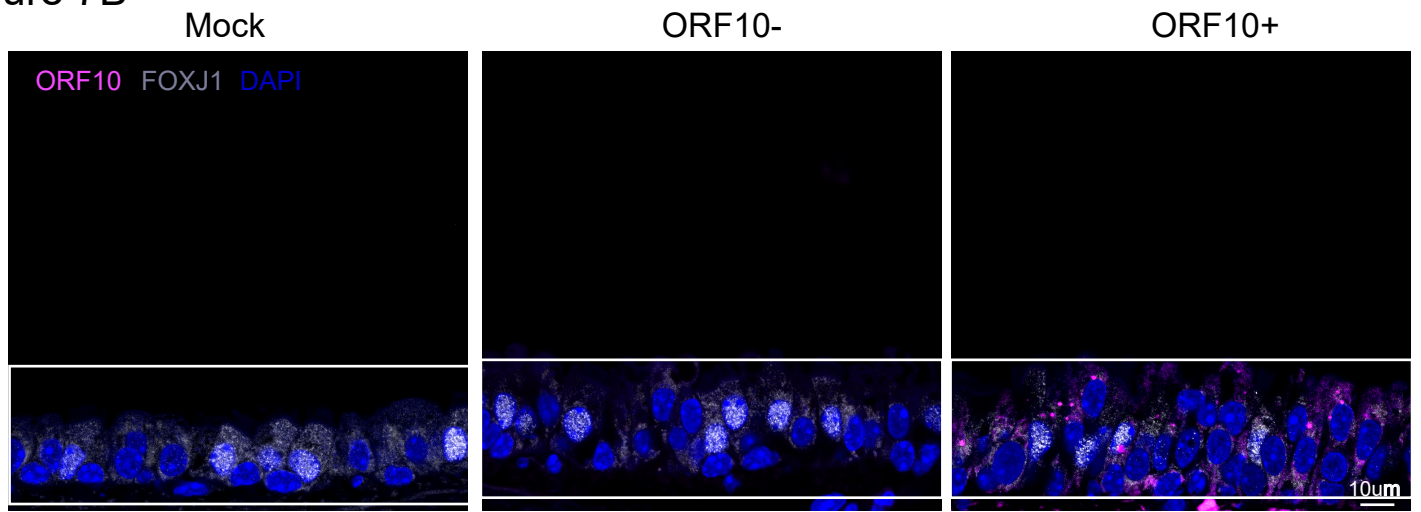

Figure 7E

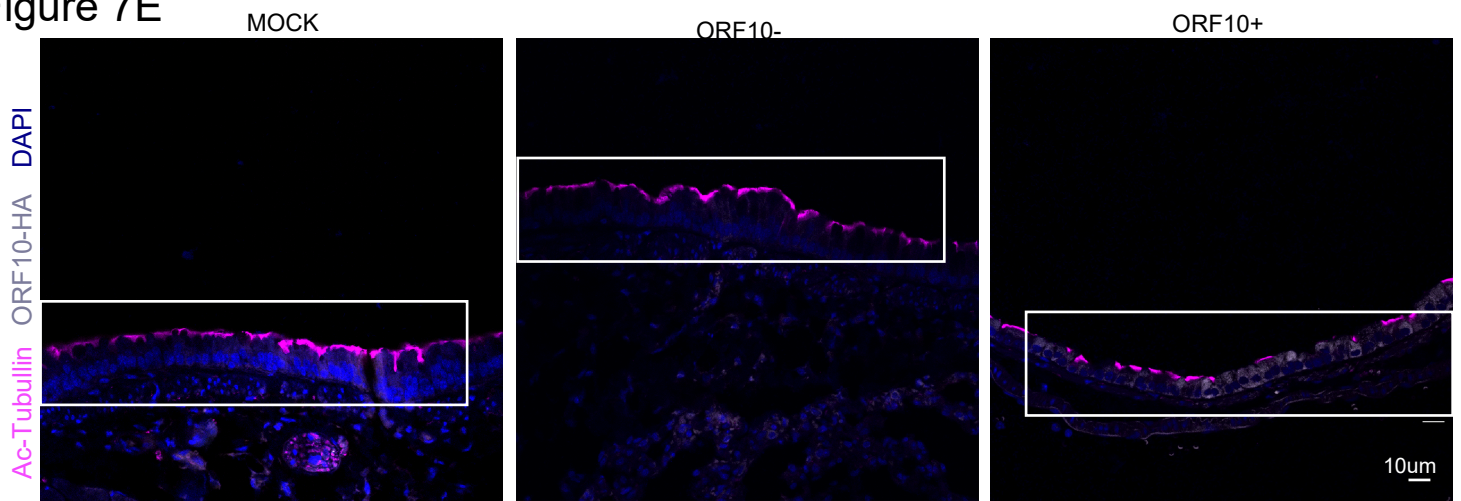

Figure 7C

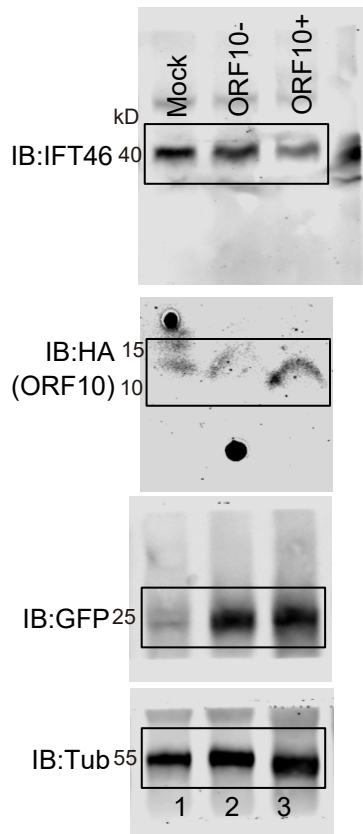

Supplement: JCB_202108015_SourceDataF7.pdf [file JCB_202108015_SourceDataF7.pdf]

Figure 8A

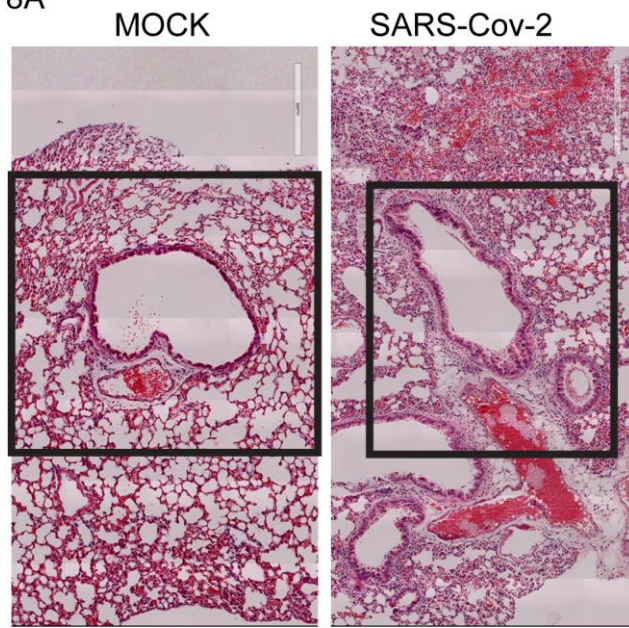

Supplement: JCB_202108015_SourceDataF8.pdf [file JCB_202108015_SourceDataF8.pdf]

Figure 9A

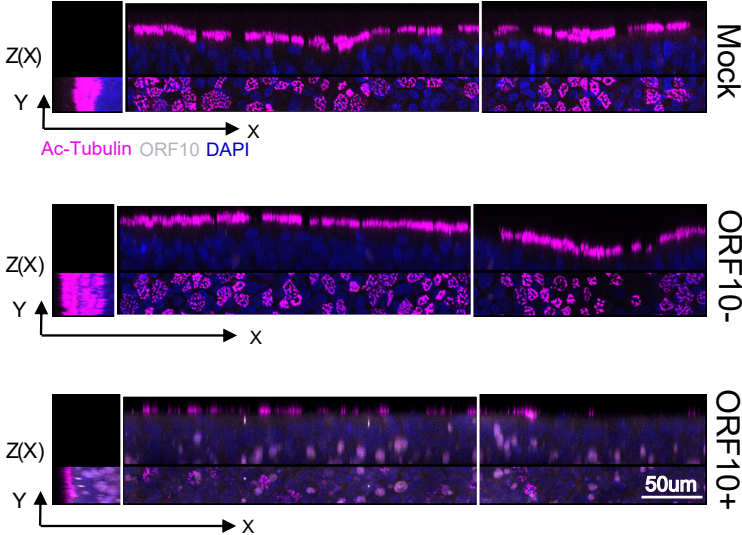

Supplement: JCB_202108015_SourceDataF9.pdf [file JCB_202108015_SourceDataF9.pdf]

Figure S2I

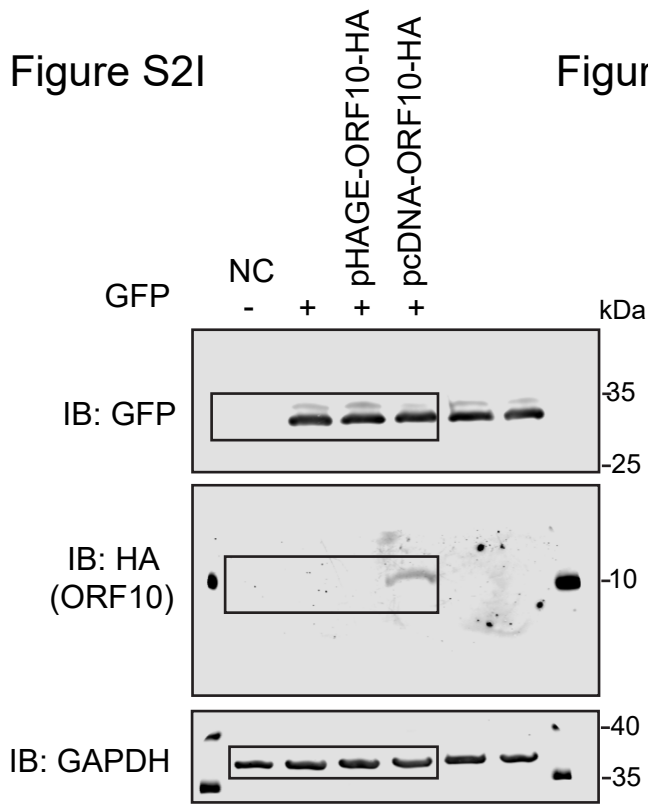

Figure S2J

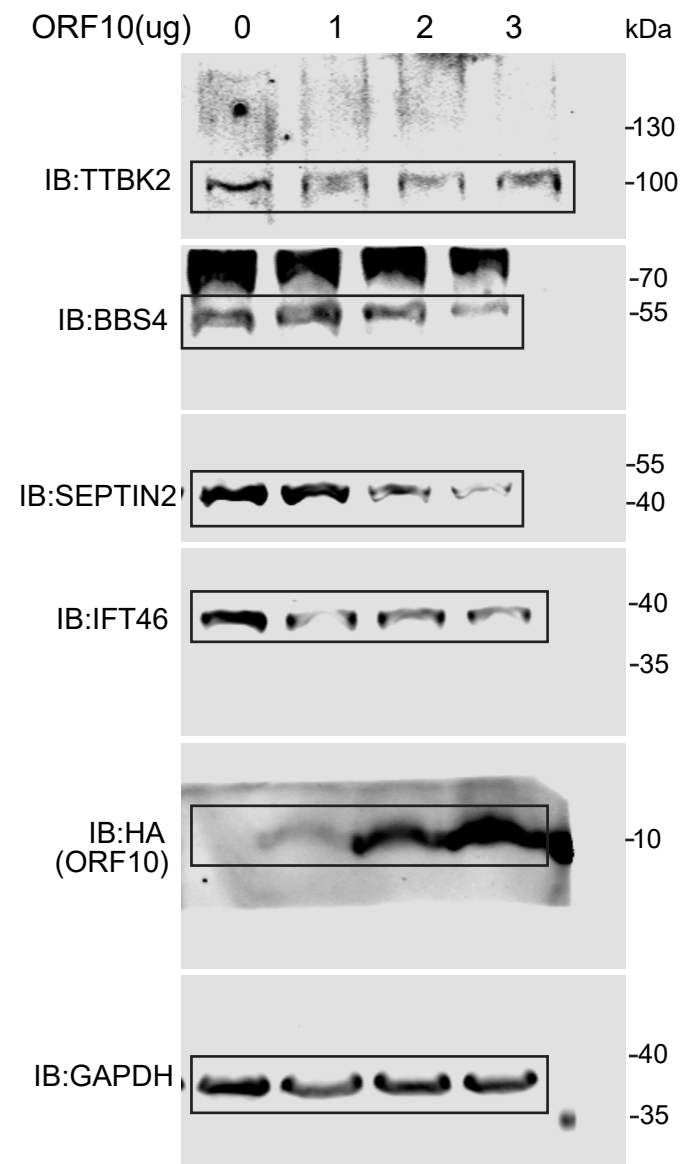

Figure S2L

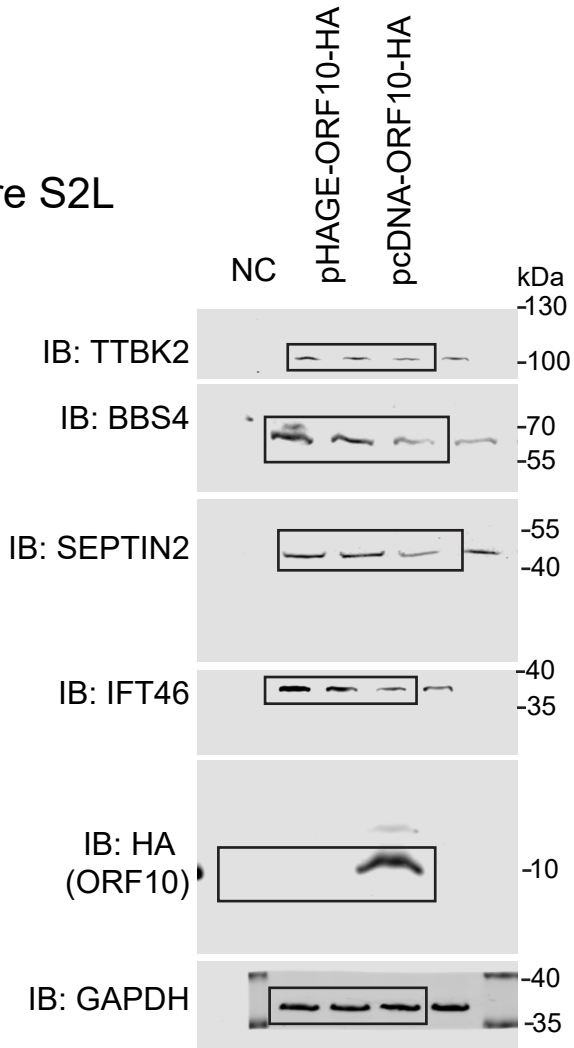

Supplement: JCB_202108015_SourceDataFS2.pdf [file JCB_202108015_SourceDataFS2.pdf]

Figure S3A

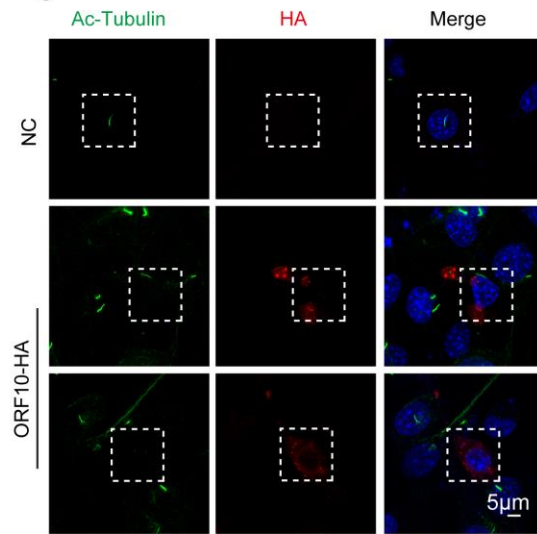

Figure S3C

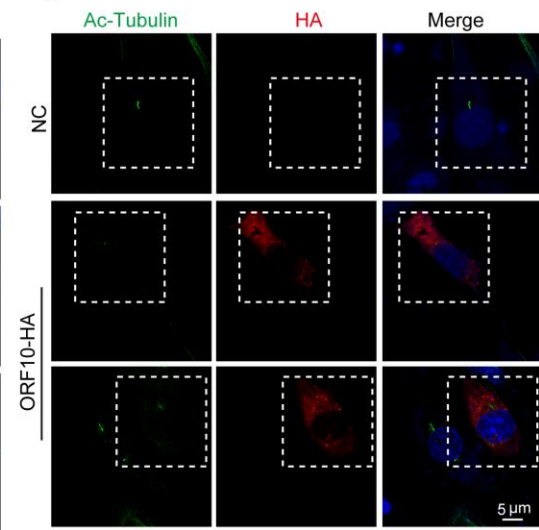

Figure S3E

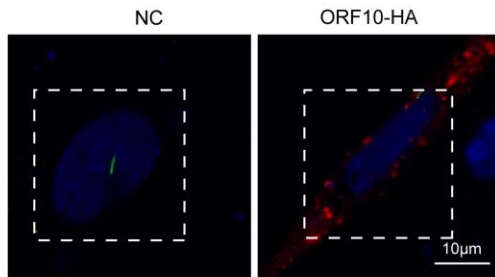

Figure S3F

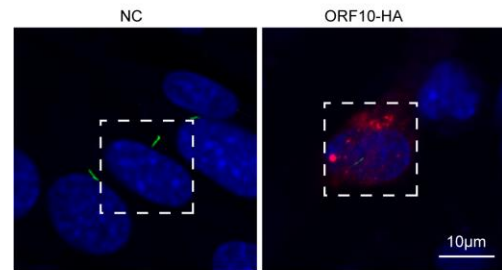

Figure S3G

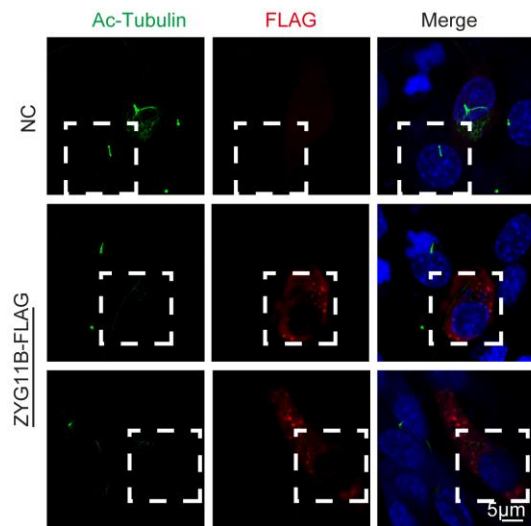

Figure S3J

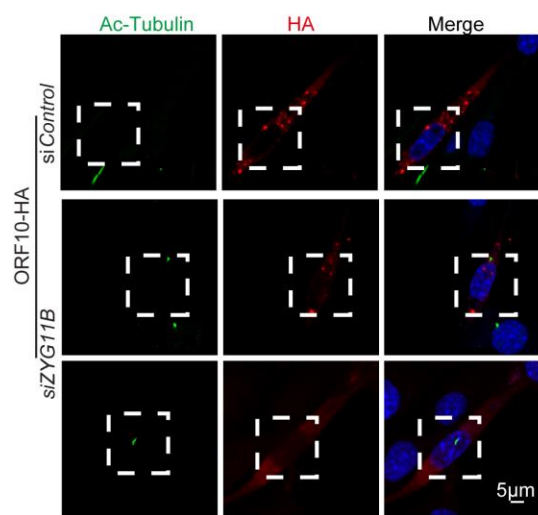

Supplement: JCB_202108015_SourceDataFS3.pdf [file JCB_202108015_SourceDataFS3.pdf]

**Figure S4A**

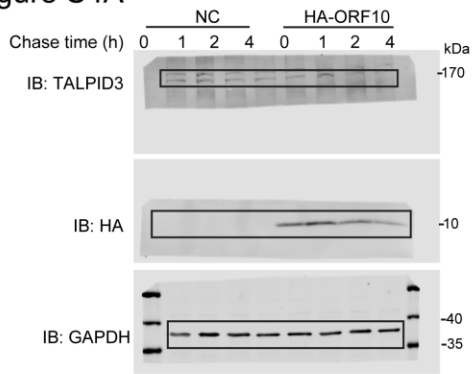

**Figure S4C**

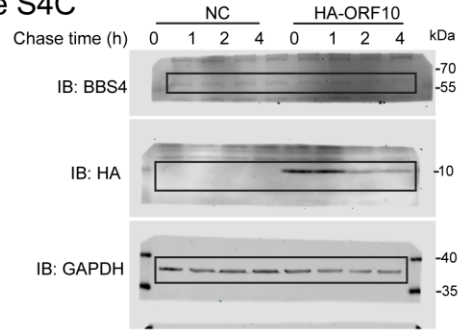

**Figure S4E**

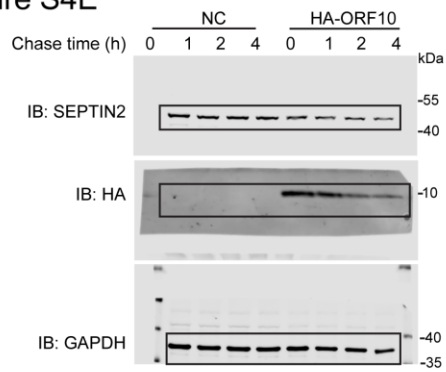

**Figure S4K**

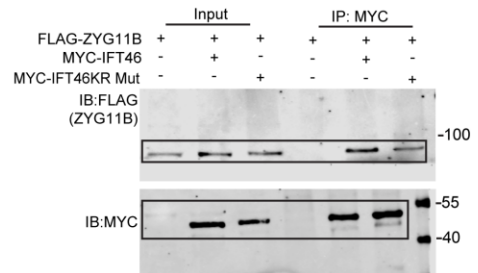

**Figure S6G**

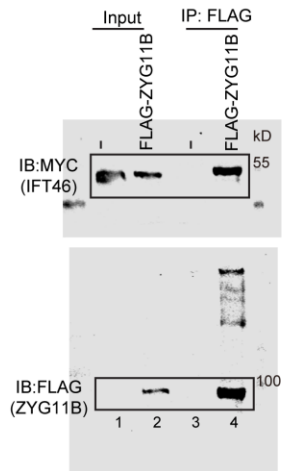

**Figure S6H**

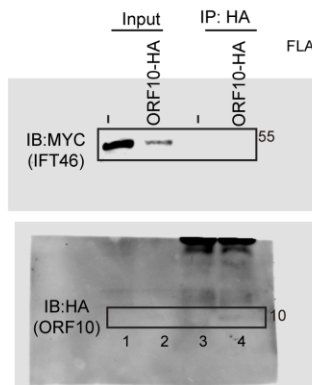

**Figure S6J**

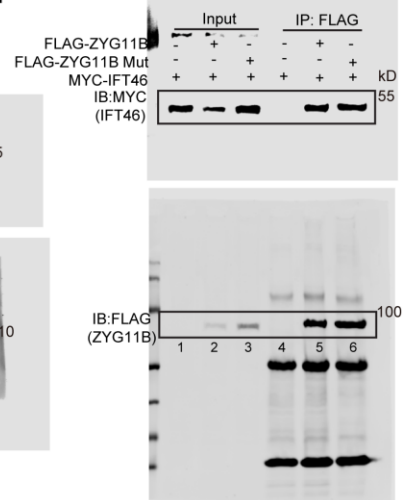

Supplement: JCB_202108015_SourceDataFS4.pdf [file JCB_202108015_SourceDataFS4.pdf]

Figure S5A

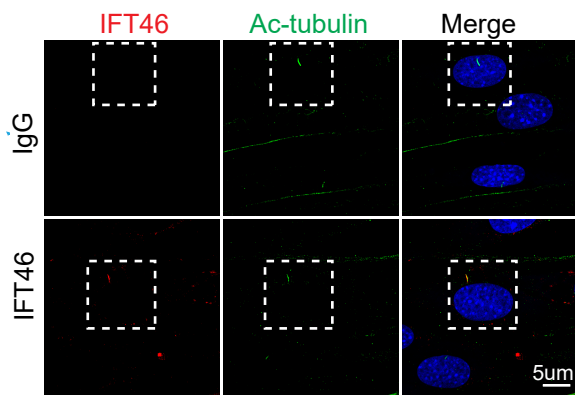

Figure S5B

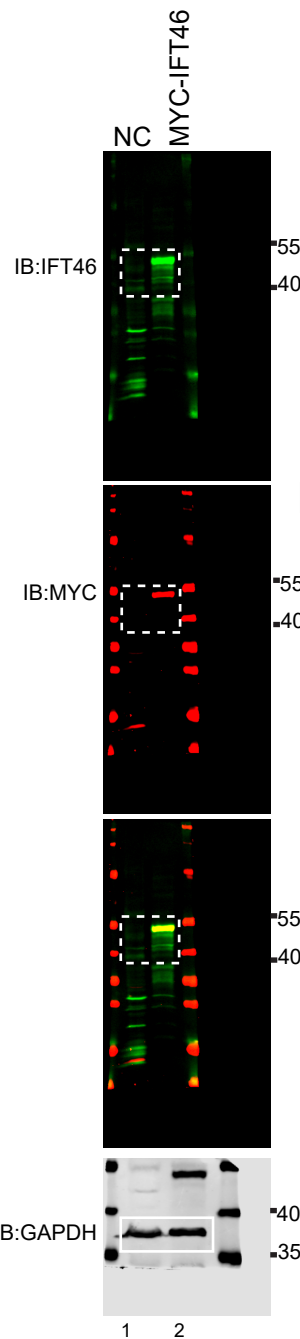

Figure S5C

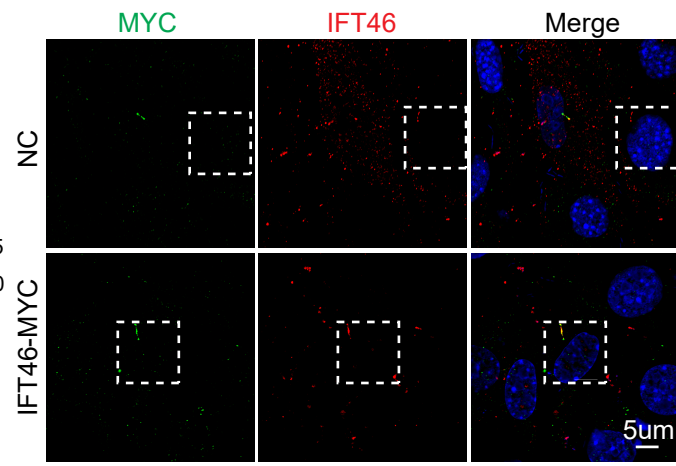

Figure S5D

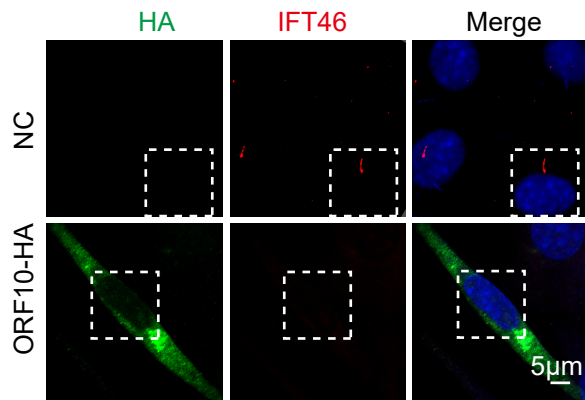

Figure S5F

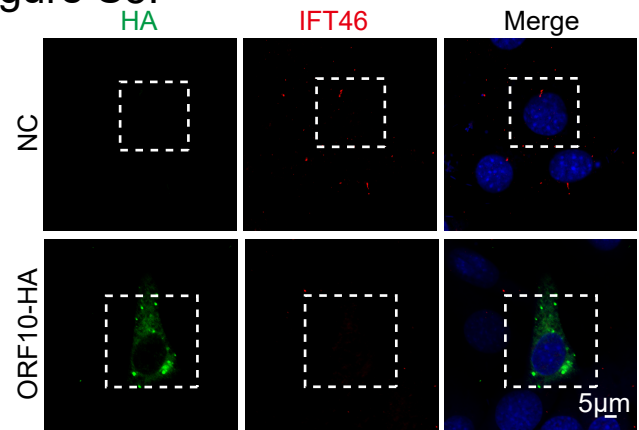

Figure S5E

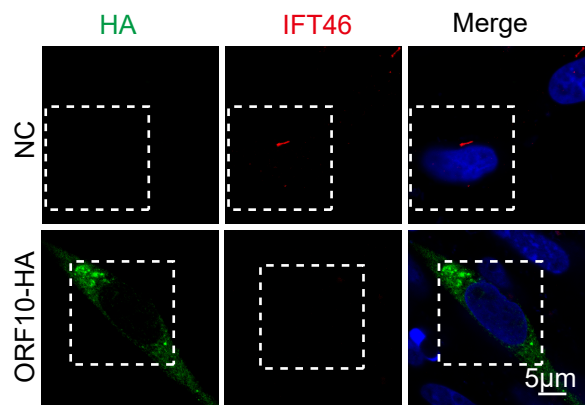

Figure S5G

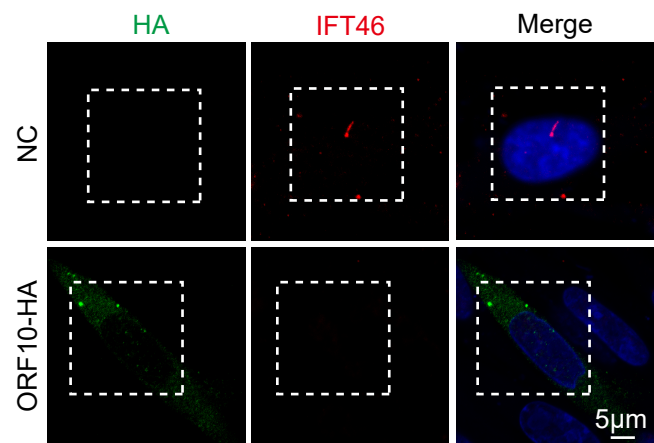

Figure S5G

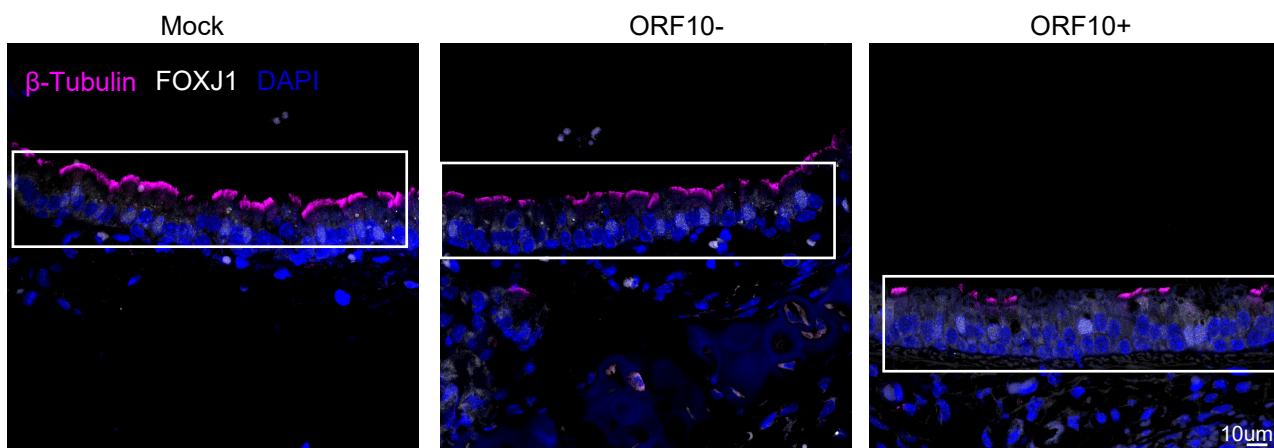

Supplement: JCB_202108015_SourceDataFS5.pdf [file JCB_202108015_SourceDataFS5.pdf]
